# Supplementary material
Source: PubMed Central journal article supplement (PMC4727447)
Supplement: NIHMS751940-supplement-1.pdf [file NIHMS751940-supplement-1.pdf]

## Supplementary Appendix

This appendix has been provided by the authors to give readers additional information about their work.

Supplement to: Beuschlein F, Fassnacht M, Assié G, et al. Constitutive activation of PKA catalytic subunit in adrenal Cushing's syndrome. *N Engl J Med* 2014;370:1019-28. DOI: [10.1056/NEJMoa1310359](https://doi.org/10.1056/NEJMoa1310359)

1 **Supplementary Appendix**

2

3 Supplement to:

4 Beuschlein F, Fassnacht M, Assie G et al. Constitutive activation of PRKACA in adrenal

5 Cushing's syndrome

6 **CONTENT**

7 Supplementary Text (Methods) page 2

8 Supplementary Figure S1 page 7

9 Supplementary Figure S2 page 8

10 Supplementary Figure S3 page 9

11 Supplementary Figure S4 page 10

12 Supplementary Figure S5 page 11

13 Supplementary Figure S6 page 12

14 Supplementary Table S1 page 13

15 Supplementary Table S2 page 14

16 Supplementary Table S3 page 15

17 Supplementary Table S4 page 18

18 Supplementary Table S5 page 20

19 Acknowledgments page 21

20 References page 23

21

22

## 1 SUPPLEMENTARY TEXT

### 2 *Variant detection*

3 Pools of 12 indexed libraries were sequenced on four lanes to an average depth of  
4 coverage between 88x and 160x. Image analysis and base calling was performed using  
5 Illumina Real Time Analysis. Reads were aligned against the human assembly hg19  
6 (GRCh37) using Burrows-Wheeler Aligner (BWA v 0.5.9). We performed single-nucleotide  
7 variant and small insertion and deletion (indel) calling specifically for the regions targeted by  
8 the exome enrichment kit, using SAMtools (v 0.1.18) and custom scripts. Subsequently the  
9 variant quality was determined using the SAMtools varFilter script. We used default  
10 parameters, with the exception of the maximum read depth (-D) and the minimum P-value for  
11 base quality bias (-2), which we set to 9999 and 1e-400, respectively. Additionally, we  
12 applied a custom script to mark all variants with adjacent bases of low median base quality.  
13 All variants were then annotated using custom Perl scripts. Annotation included information  
14 about known transcripts (UCSC Known Genes and RefSeq genes), known variants (dbSNP v  
15 135), type of mutation and - if applicable – amino acid change in the corresponding protein.  
16 The annotated variants were then inserted into our in-house database. To discover putative  
17 somatic variants, we queried our database to show only those variants of a tumor that were not  
18 found in the corresponding control tissue. To reduce false positives we filtered out variants  
19 that were already present in our database, had a variant quality of less than 40, or failed one of  
20 the filters from the filter scripts. We then manually investigated the raw read data of the  
21 remaining variants using the Integrative Genomics Viewer (IGV).

## 1 ***PRKACA* sequencing**

2 DNA was amplified using intron-spanning primers for the coding region of the  
3 catalytic subunit of PKA. Bidirectional Sanger sequencing was performed using the ABI  
4 BigDye Terminator v.3.1 Cycle Sequencing Kit. Primer sequences (*PRKACA\_ex6-7\_F*, 5'-  
5 GTTTCTGACGGCTGGACTG-3'; *PRKACA\_ex6-7\_R*, 5'-AGTCCACGGCCTTGTTGTAG-  
6 3') were designed using the ExonPrimer software as described earlier.<sup>1</sup> For the *PRKACA* gene  
7 screening for germline mutations of the patients with bilateral ACTH independent adrenal  
8 hyperplasia, intron-spanning primers for the coding region of the catalytic subunit of PKA  
9 were designed using the software Primer3Web version 4.0.0 (<http://bioinfo.ut.ee/primer3/>,  
10 sequence on request).

## 11 ***Comparative genomic hybridization and fluorescent in situ hybridization***

12 Array-CGH analysis was performed using 4×180K oligonucleotide commercial arrays  
13 (Agilent Technologies, Santa Clara, CA) as previously described<sup>2</sup> and a custom designed  
14 8x60K array was used (Agilent Technologies), covering with an increased resolution the  
15 coding region (average probe spacing 100 bp) and the flanking 1 Mb (average probe spacing  
16 500 bp) of the *PRKACA* gene and of 6 other genes encoding for PRKA subunits (*PRKARIA*,  
17 *PRKAR2A*, *PRKAR1B*, *PRKAR2B*, *PRKACB* and *PRKACG*) and their 1 Mb flanking regions  
18 (average probe spacing of 500 bp). The arrays were scanned in a dual-laser scanner (DNA  
19 Microarray Scanner with Sure Scan High-Resolution Technology, Model G2565CA, Agilent  
20 Technologies) and the images were extracted and analyzed through the Agilent Feature  
21 Extraction software (v10.5.1.1) and the Genomic Workbench v. 5.0.14 software (Agilent,  
22 ADM-2 algorithm with a threshold of 5, respectively. DNA copy number changes were  
23 observed as the deviation of the log<sub>2</sub>ratio value from the value of 0 of at least three  
24 consecutive probes. The quality of each experiment was assessed by using a parameter

1 provided by the Agilent software (QC metric) and on the basis of DNA quality. Copy number  
2 changes identified in the samples were compared to the Database of Genomic Variants  
3 (<http://projects.tcag.ca/variation/>) and also visualized by using the UCSC Genome Browser  
4 website (<http://genome.ucsc.edu/>). Included in the deletion interval shared by the four  
5 duplications are the full open-reading frames of 12 protein-coding genes *C19orf57* (ID  
6 79173), *CC2D1A* (ID 54862), *PODNL1* (ID 79883), *DCAF15* (ID 90379), *RFX1* (ID 5989),  
7 *RLN3* (ID 117579), *IL27RA* (ID 605350), *PALM3* (ID 342979), *C19orf67* (ID 646457),  
8 *SAMD1* (ID 90378), *PRKACA* (ID 5566), *ASF1B* (ID 55723). The positions of oligomers  
9 refer to the Human Genome assembly (hg19). Detected abnormalities were confirmed by  
10 fluorescent in situ hybridization which was performed using commercially available BAC  
11 clones specific to the *PRKACA* gene locus and performed as described previously.<sup>2</sup>

## 12 ***Protein homology analysis***

13 The protein sequence alignment for the catalytic subunit of protein kinase A in man  
14 (accession no. NP\_002721), zebrafish (NP\_001076309), acorn worm (XP\_002740161) and  
15 fruitfly (NP\_995672) was performed with the CLC Sequence Viewer 6.5.1 software (CLC  
16 Bio A/S, Sweden).

## 17 ***FRET assays***

18 HEK293 cells were cultured in DMEM+10% FCS at 37 °C and in the presence of 5%  
19 (vol/vol) CO<sub>2</sub>. Cells were plated on 24-mm round glass coverslips and transfected with the  
20 indicated amount of DNA and Effectene (Qiagen), following the manufacturer's protocol.  
21 Cells were analyzed 24h after transfection in a buffer containing 144 mM NaCl, 5.4 mM KCl,  
22 1 mM MgCl<sub>2</sub>, 2 mM CaCl<sub>2</sub> and 10 mM HEPES, pH 7.3. FRET imaging was performed as  
23 previously described.<sup>3</sup> Equimolar concentrations of a cell-permeable pair of synergistic cAMP  
24 analogs (N6-mono-tert.-butylcarbamoyladenosine-cAMP and 5,6-dichloro-1-β-D-

1 ribofuranosylbenzimidazole-3',5'-cyclic monophosphorothioate Sp-isomer) were used to  
2 selectively activate PKA II <sup>4</sup>. HEK293 cells were transfected with the following constructs:  
3 0.2 µg AKAR4-NES PKA sensor, 0.1µg PKA Cα subunit (wild-type or mutant) and 0.8 µg of  
4 either RIIβ or empty vector. For co-expression of mutant and wild-type PKA Cα subunits,  
5 0.5µg of each corresponding construct were used. Cells were stimulated with increasing  
6 concentrations of cAMP analogs, followed by maximal stimulation of cAMP production with  
7 10µM forskolin and PKA inhibition with 20µM H89. PKA activity was continuously  
8 monitored during the course of the experiment by FRET microscopy. Data are normalized to  
9 the maximal (i.e. after forskolin) and minimal (i.e. after H89) values.

10

### 11 *Real-time PCR*

12 RNA from leukocytes and adrenal tissue was extracted and subjected to a SYBR  
13 Green PCR master mix and *PRKACA* cDNA primer pairs (Exon 3-4: 5'-  
14 AGGAGACCGGGAACCACTAT-3' and 5'-TTCAGGGTGTGTTTCGATCTG-3'. Exon 5-6:  
15 5'-CGGGGAGATGTTCTCACAC-3' and 5'-ATCTGGGCCGCGTAGAAAC-3'. Exon 7-8:  
16 5'-CGGCACCCCTGAGTACCT-3' and 5'-AGTCCACGGCCTTGTTGT-3') to determine  
17 the relative quantity of *PRKACA* RNA levels. Actin beta (*ACTB*, forward primer: 5'-  
18 CCTAGGCACCAGGGTGTG-3' and reverse primer: 5'-CTTCTCCATGTTCGTCACAGT-3')  
19 was used as an endogenous control. The reactions were run in an Applied Biosystems ViiA™  
20 7 Real-time System using standard parameters. Relative quantification was performed using  
21 the 2-ΔΔCT method.<sup>5</sup>

## 1 ***Microarray analysis***

2 Tissue RNA was extracted as described earlier.<sup>6</sup> Microarray experiments were  
3 performed using Affymetrix U133 Plus 2.0 chips. The full dataset can be found at Array  
4 Express (<http://www.ebi.ac.uk/arrayexpress>, experiment E-TABM-311). All the transcriptome  
5 analyses were carried out using “R” and normalization was performed using the RMA  
6 method. For specific expression analysis no correction for multiple testing was implemented.  
7 The functional annotation of gene lists was performed with the Database for Annotation,  
8 Visualization and Integrated Discovery (DAVID) v6.7, using Gene Ontology  
9 (<http://www.geneontology.org>) annotations.

10

## 11 ***Reference ranges for endocrine parameters***

12 The clinical investigations utilized in this retrospective analysis were performed in  
13 different centers and laboratories resulting in some variation between the reference ranges and  
14 study protocols. All centers used the same normal range for plasma ACTH (10-50 pg/ml) and  
15 for serum cortisol after 1 mg dexamethasone ( $< 1.8 \mu\text{g/dl}$ ). However, there was significant  
16 variation between clinical centers for urinary free cortisol due to assay differences (upper  
17 limit of normal for urinary free cortisol, 38-218  $\mu\text{g}/24$  hours) and on the procedure to assess  
18 midnight hypercortisolism (midnight salivary  $< 1.5\text{ng/ml}$  or midnight serum cortisol  $<$   
19  $5\mu\text{g/dl}$ ), respectively. Therefore, for the latter parameters the results were calculated and  
20 expressed as fold changes of the upper limit of normal.

21

- 1 **Supplementary Figure S1:** Overview on the patient series included in the genetic analysis. (\*) Patients with bilateral adrenal hyperplasia and
- 2 ACTH independent Cushing's syndrome without germline mutations in *PRKARIA*, *PDE11A* or *PDE8B* or somatic *GNAS* mutations.

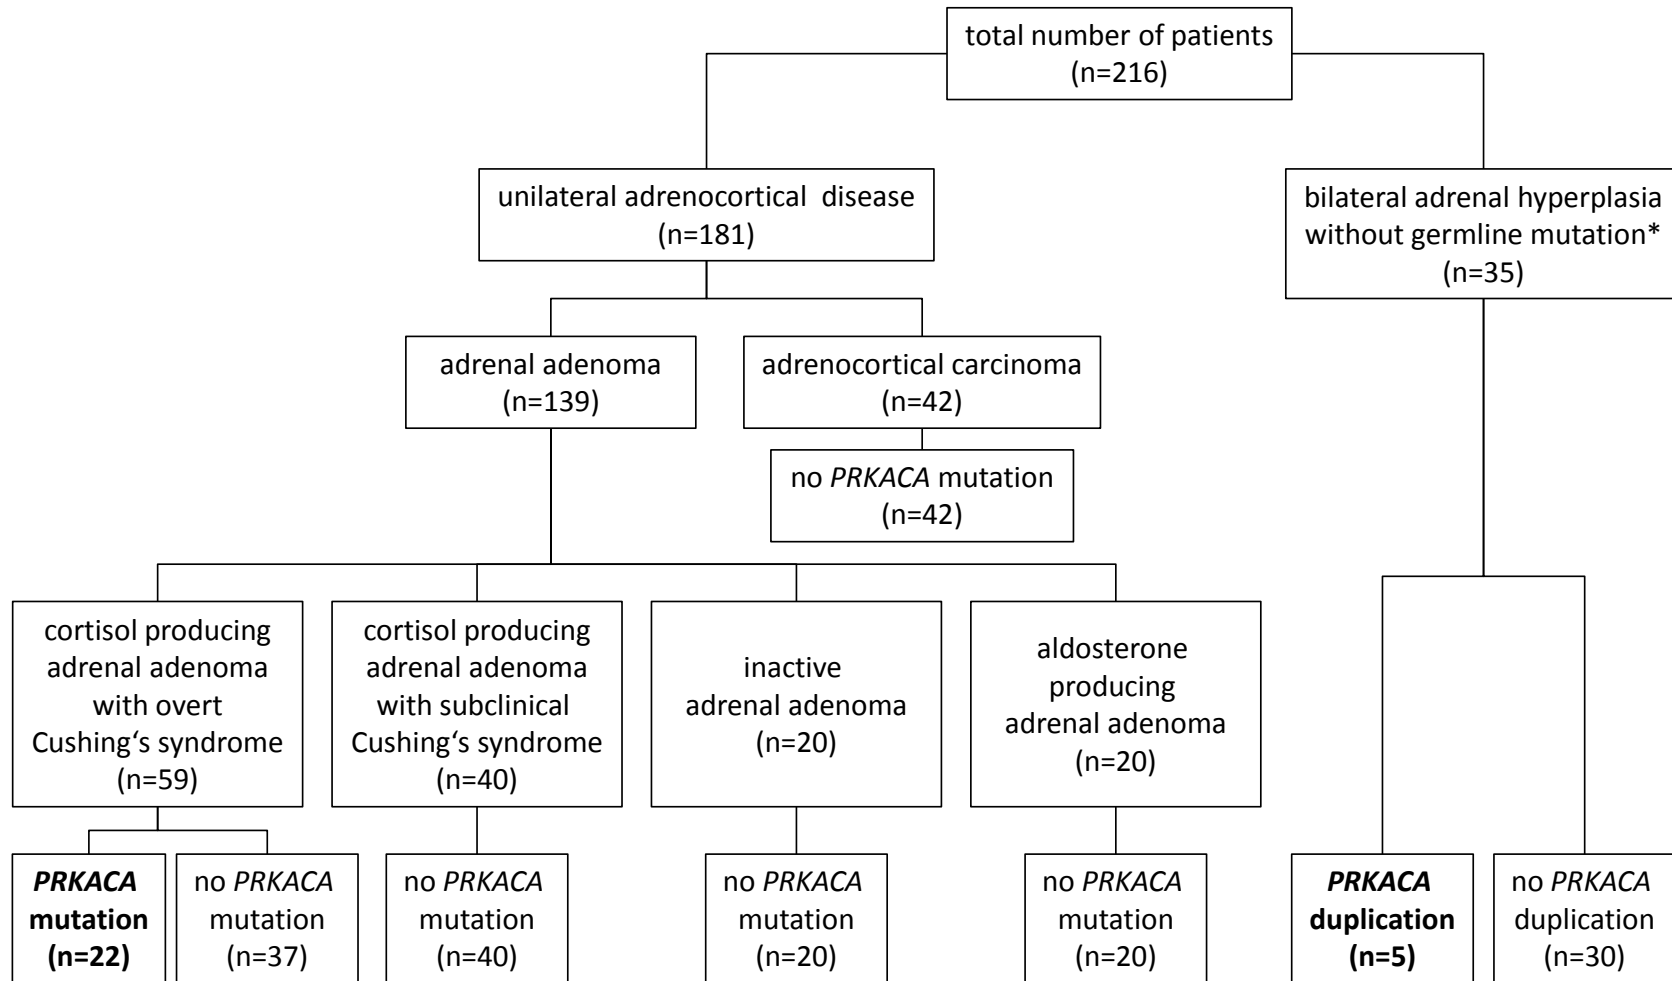



1 **Supplementary Figure S2:** Leu206 in PRKACA is directly adjacent to the activation loop (aa. 184-204), a major substrate binding site (aa. 198-  
 2 204), and a major site of interaction with the regulatory subunits (aa. 197-205), and displays a high level of conservation among species.

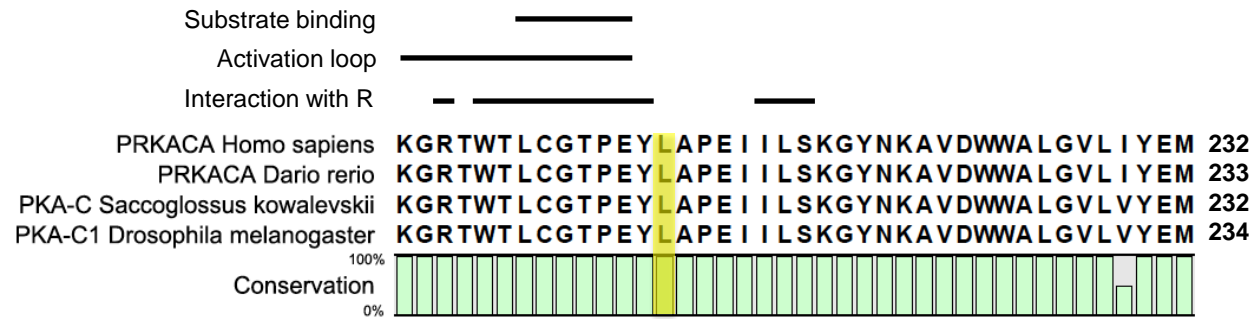

5

6

7

- 1 **Supplementary Figure S3:** To address the question of genetic tumor heterogeneity a subset of adenomas (n=4) carrying the mutation were  
2 dissected thereby generating 3-4 fragments per adenoma. As demonstrated by Sanger sequencing in all fragments the mutation was detected at  
3 comparable ratios.

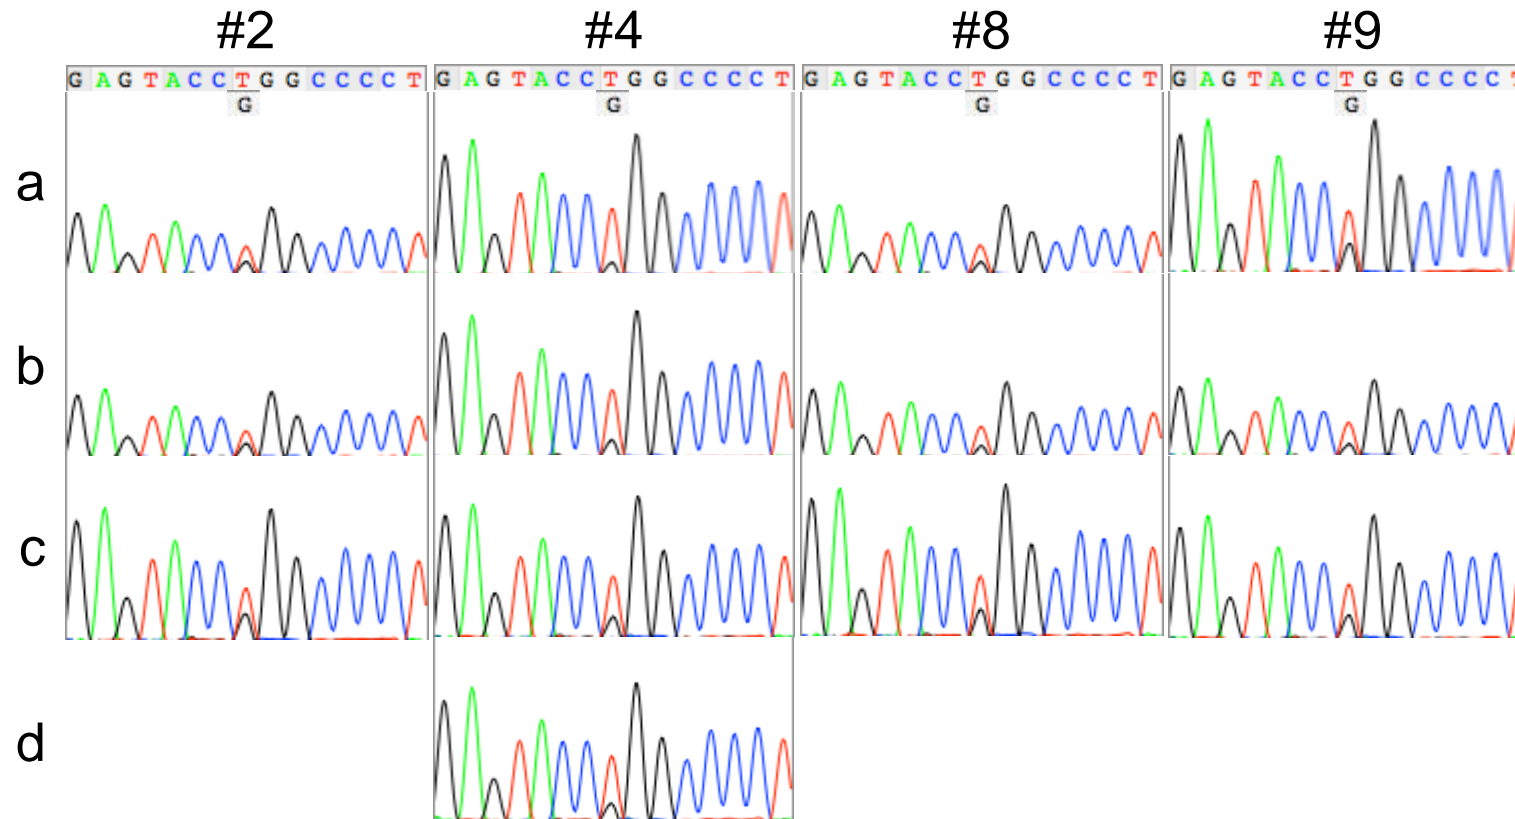

4

5

1 **Supplementary Figure S4:** HEK293 cells were transfected and stimulated with increasing concentrations of a PKA II-selective pair of cAMP  
 2 analogs, followed by maximal stimulation of cAMP production with forskolin and PKA inhibition with H89. Each black triangle on the x-axis  
 3 indicates the addition of cAMP analogs (from 3.175 to 100  $\mu$ M). PKA activity in cells transfected only with either wild-type *PRKACA* ( $C\alpha^{wt}$ ) or  
 4 the Leu206Arg mutant ( $C\alpha^{Leu206Arg}$ ) remained high and was not affected by stimulation with cAMP analogs, indicating that both variants were  
 5 catalytically active. Whereas co-transfection of wild-type RII $\beta$  decreased basal PKA activity and rendered cells transfected with wild-type  
 6 *PRKACA* responsive to cAMP analogs, this was not observed for the Leu206Arg mutant.

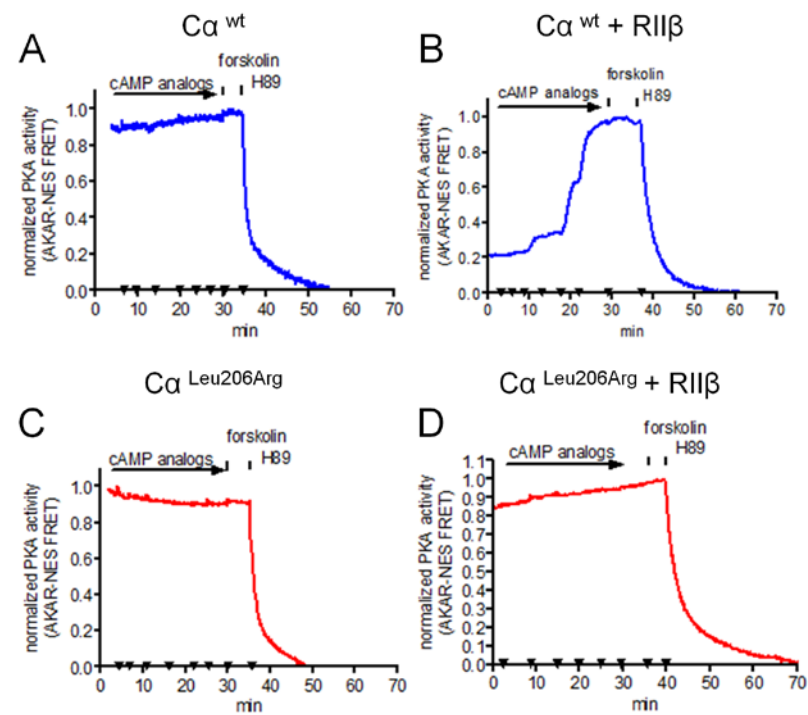

1 **Supplementary Figure S5:** (A) PKA enzymatic activity measured in tissue samples from patients with adrenocortical adenomas in dependence  
2 of their *PRKACA* mutational status. (\*) indicates significant differences between cAMP treated and baseline values while (#) indicates  
3 differences of baseline activity between wild type (wt) and *PRKACA* mutated (mut) adenomas.

4

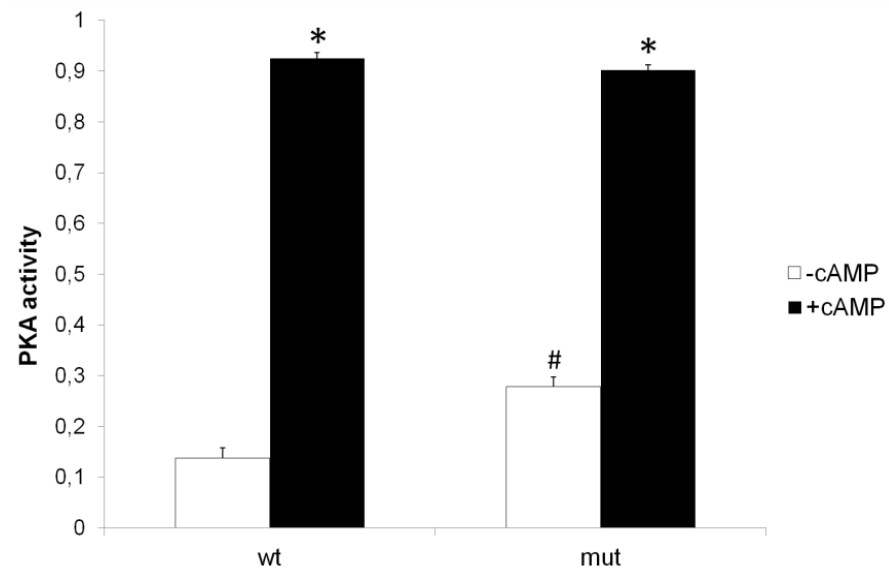

5

6

1 **Supplementary Figure S6:** Functional consequences of *PRKACA* gene duplication: Higher adrenal *PRKACA* mRNA expression (A) and  
 2 *PRKACA* protein levels (B) as well as more intense immunostaining (C) in an adrenal tumor from a patient with a *PRKACA* duplication (patient  
 3 1) in comparison to a cortisol producing tumor from a patient without any known genetic defects. (D) PKA activity quantified in adrenal samples  
 4 of patients harboring the *PRKACA* duplication in comparison to control adrenals indicating elevated PKA activity under cAMP stimulated  
 5 conditions.

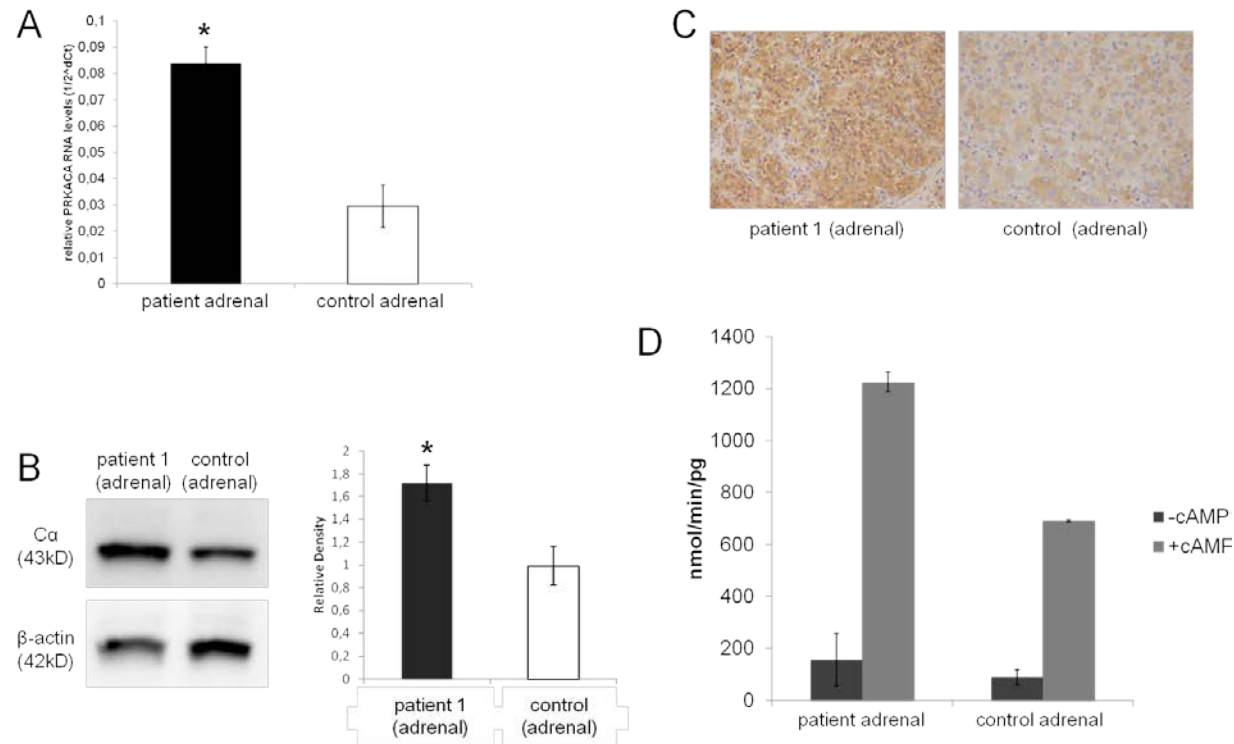

6

7

1 **Supplementary Table S1:** Available genetic and molecular investigations for included patient series.

|                                                       | cortisol producing<br>adrenal adenoma<br>with overt<br>Cushing's<br>syndrome<br>(n=59)* | cortisol producing<br>adrenal adenoma<br>with subclinical<br>Cushing's<br>syndrome<br>(n=40)* | inactive adrenal<br>adenoma<br>(n=20)* | aldosterone<br>producing adrenal<br>adenoma<br>(n=20)* | adrenocortical<br>carcinoma<br>(n=42)* | bilateral adrenal<br>hyperplasia<br>without germline<br>mutation<br>(n=40)* |
|-------------------------------------------------------|-----------------------------------------------------------------------------------------|-----------------------------------------------------------------------------------------------|----------------------------------------|--------------------------------------------------------|----------------------------------------|-----------------------------------------------------------------------------|
| Exome sequencing (tumor/hyperplasia)                  | 10                                                                                      | -                                                                                             | -                                      | 9                                                      | -                                      | 10                                                                          |
| <i>PRKACA</i> sequencing (tumor/hyperplasia)          | 14                                                                                      | 15                                                                                            | 4                                      | -                                                      | 15                                     | -                                                                           |
| <i>PRKACA</i> targeted sequencing (tumor/hyperplasia) | 37                                                                                      | 23                                                                                            | 16                                     | 11                                                     | 27                                     | -                                                                           |
| SNP analysis (tumor/hyperplasia) <sup>#</sup>         | 7                                                                                       | 9                                                                                             | 8                                      | -                                                      | 22                                     | -                                                                           |
| Comparative genomic hybridization (L-DNA)             | -                                                                                       | -                                                                                             | -                                      | -                                                      | -                                      | 35                                                                          |
| Micorarray expression analysis <sup>§</sup>           | 19                                                                                      | 11                                                                                            | 9                                      | -                                                      | -                                      | -                                                                           |

2

3 \* total number of included patients (as given in Supplementary Figure 1); due to overlapping investigations, numbers per column do not count up to total n. <sup>#</sup> patient series  
4 reported in Ronchi et al.<sup>7</sup> <sup>§</sup> patient series partly reported in Wilmot et al.<sup>8</sup>

5

1 **Supplementary Table S2:** Clinical characteristics of the patient group with cortisol producing adrenal adenoma included in exome sequencing

| pat. # | sex | age at diagnosis (years) | tumor size (mm) | ACTH (pg/ml) | midnight salivary cortisol (ng/ml) | midnight serum cortisol (µg/dl) | serum cortisol after 1mg Dex (µg/dl) | 24h urinary cortisol (µg/d) | <i>PRKACA</i> mutation |
|--------|-----|--------------------------|-----------------|--------------|------------------------------------|---------------------------------|--------------------------------------|-----------------------------|------------------------|
| #1     | f   | 43                       | 25              | <5.0         | 6.1                                | -                               | 15.9                                 | -                           | p.Leu206Arg            |
| #2     | f   | 47                       | 30              | <5.0         | 21.0                               | -                               | 21.0                                 | 799                         | p.Leu206Arg            |
| #3     | f   | 48                       | 21              | -            | 4.0                                | -                               | 14.8                                 | 288                         | p.Leu199_Cys200insTrp  |
| #4     | f   | 37                       | 24              | <5.0         | 5.8                                | -                               | 12.6                                 | 447                         | p.Leu206Arg            |
| #5     | f   | 42                       | 21              | <5.0         | -                                  | -                               | 23.0                                 | -                           | p.Leu206Arg            |
| #6     | m   | 70                       | 110             | 5.0          | -                                  | 9.5                             | 11.4                                 | -                           | none                   |
| #7     | f   | 55                       | 50              | 8.1          | -                                  | 13.7                            | 15.7                                 | -                           | none                   |
| #8     | f   | 29                       | 35              | 5.0          | -                                  | -                               | 39.0                                 | 1772                        | p.Leu206Arg            |
| #9     | f   | 41                       | 35              | <5.0         | -                                  | -                               | 22.4                                 | 418                         | p.Leu206Arg            |
| #10    | f   | 42                       | 30              | <5.0         | -                                  | 22.6                            | 17.2                                 | 172                         | p.Leu206Arg            |

2

3 Dex, dexamethasone. To convert ACTH from pg/ml to pmol/l multiply by 0.22, salivary cortisol from ng/ml to µmol/l by 0.0028, serum cortisol from µg/dl to µmol/l by  
4 0.028 and urinary cortisol from µg/d to nmol/d by 2.76, respectively. For reference ranges of the endocrine parameters see Supplementary Text above (page 6).

5

6

1 **Supplementary Table S3: Overview on mutations found in individual tumor samples upon exome sequencing**

| Pat.#    | Type               | Genomic position                | Transcript     | cDNA level            | Protein level | Gene symbol   | Effect on protein | # of reads from tumor |                 |                | # of reads from blood |                 |
|----------|--------------------|---------------------------------|----------------|-----------------------|---------------|---------------|-------------------|-----------------------|-----------------|----------------|-----------------------|-----------------|
|          |                    |                                 |                |                       |               |               |                   | Ref. allele           | Non-ref. allele | % of all reads | Ref. allele           | Non-ref. allele |
| #1       | missense           | chr10:g.127967523C>T            | NM_003474.4    | c.221G>A              | p.Arg74Gln    | ADAM12        | Arg74Gln          | 29                    | 12              | 29.27%         | 57                    | 1               |
|          | missense           | chr19:g.14208416A>C             | NM_002730.3    | c.617T>G              | p.Leu206Arg   | <b>PRKACA</b> | Leu206Arg         | 220                   | 98              | 30.82%         | 283                   | 0               |
|          | missense           | chr2:g.207615789G>C             | NM_001039845.1 | c.921C>G              | p.Asp307Glu   | MDH1B         | Asp307Glu         | 72                    | 27              | 27.27%         | 158                   | 1               |
|          | missense           | chr4:g.57182589C>T              | NM_020722.1    | c.2921C>T             | p.Ala974Val   | KIAA1211      | Ala974Val         | 156                   | 87              | 35.80%         | 235                   | 0               |
| #2       | missense           | chr1:g.93659282C>A              | NM_206886.3    | c.679C>A              | p.Gln227Lys   | CCDC18        | Gln227Lys         | 3                     | 3               | 50.00%         | 9                     | 0               |
|          | missense           | chr1:g.165621232C>A             | NM_004528.3    | c.209C>A              | p.Pro70His    | MGST3         | Pro70His          | 99                    | 21              | 17.50%         | 114                   | 0               |
|          | missense           | chr10:g.61413447C>A             | NM_194298.2    | c.1337G>T             | p.Gly446Val   | SLC16A9       | Gly446Val         | 61                    | 24              | 28.24%         | 136                   | 0               |
|          | missense           | chr12:g.6708983G>A              | NM_001273.2    | c.1438C>T             | p.Leu480Phe   | CHD4          | Leu480Phe         | 156                   | 102             | 39.53%         | 263                   | 2               |
|          | missense           | chr16:g.150437T>C               | NM_001039476.1 | c.163A>G              | p.Lys55Glu    | NPRL3         | Lys55Glu          | 31                    | 16              | 34.04%         | 32                    | 0               |
|          | indel              | chr16:g.58030765_58030767delAGA | NM_020807.1    | c.1403_1405delTC<br>T | p.Phe468del   | ZNF319        | Phe468del         | 133                   | 26              | 16.35%         | 149                   | 0               |
|          | missense           | chr19:g.14043654C>T             | NM_001146254.1 | c.1397G>A             | p.Gly466Asp   | PODNL1        | Gly466Asp         | 78                    | 20              | 20.41%         | 91                    | 0               |
|          | missense           | chr19:g.14208416A>C             | NM_002730.3    | c.617T>G              | p.Leu206Arg   | <b>PRKACA</b> | Leu206Arg         | 253                   | 136             | 34.96%         | 445                   | 2               |
|          | missense           | chr19:g.17306250C>G             | NM_001130065.1 | c.4014C>G             | p.His1338Gln  | MYO9B         | His1338Gln        | 16                    | 8               | 33.33%         | 14                    | 0               |
|          | indel              | chr21:g.43309330_43309332dup    | NM_199050.2    | c.1527_1529dup        | p.Lys510dup   | C2CD2         | Lys510dup         | 122                   | 22              | 15.28%         | 101                   | 0               |
|          | missense           | chr22:g.50962431C>T             | NM_001169109.1 | c.410G>A              | p.Cys137Tyr   | SCO2          | Cys137Tyr         | 169                   | 53              | 23.87%         | 271                   | 1               |
|          | nonsense           | chrX:g.110654004G>A             | NM_000555.3    | c.199C>T              | p.Gln67*      | DCX           | Gln67*            | 70                    | 26              | 27.08%         | 109                   | 1               |
| missense | chr1:g.16069136C>A | NM_001013641.1                  | c.82C>A        | p.Leu28Met            | TMEM82        | Leu28Met      | 491               | 122                   | 19.90%          | 683            | 1                     |                 |
| missense | chrX:g.37850357G>A | NM_012274.1                     | c.265G>A       | p.Val89Met            | CXorf27       | Val89Met      | 162               | 31                    | 16.06%          | 189            | 0                     |                 |
| #3       | missense           | chr1:g.164768954A>G             | NM_001204961.1 | c.529A>G              | p.Thr177Ala   | PBX1          | Thr177Ala         | 108                   | 26              | 19.40%         | 108                   | 0               |
|          | missense           | chr12:g.99060032A>G             | NM_001160.2    | c.1226A>G             | p.Asn409Ser   | APAF1         | Asn409Ser         | 78                    | 23              | 22.77%         | 143                   | 0               |
|          | splice             | chr13:g.113750862A>T            | NM_001112732.2 | c.3189-2A>T           |               | MCF2L         |                   | 57                    | 20              | 25.97%         | 50                    | 1               |
|          | missense           | chr16:g.57490503C>T             | NM_020312.3    | c.466C>T              | p.Arg156Trp   | COQ9          | Arg156Trp         | 93                    | 42              | 31.11%         | 137                   | 0               |
|          | frameshift         | chr19:g.17514614_17514614delT   | NM_004335.2    | c.433delA             |               | BST2          | Ser145Alafs*2     | 142                   | 27              | 15.98%         | 156                   | 0               |
|          | missense           | chr20:g.20033207G>T             | NM_016652.4    | c.263C>A              | p.Ser88Tyr    | CRNKL1        | Ser88Tyr          | 122                   | 58              | 32.22%         | 142                   | 0               |
|          | missense           | chr20:g.48156124C>A             | NM_000961.3    | c.656G>T              | p.Arg219Leu   | PTGIS         | Arg219Leu         | 47                    | 22              | 31.88%         | 54                    | 0               |



|    |            |                                          |                |                           |                       |               |                     |     |     |        |     |   |
|----|------------|------------------------------------------|----------------|---------------------------|-----------------------|---------------|---------------------|-----|-----|--------|-----|---|
|    | missense   | chr21:g.47961713C>T                      | NM_015151.3    | c.2081C>T                 | p.Ser694Leu           | DIP2A         | Ser694Leu           | 48  | 17  | 26.15% | 67  | 0 |
|    | missense   | chr4:g.96044999A>G                       | NM_001203.2    | c.388A>G                  | p.Ile130Val           | BMPR1B        | Ile130Val           | 19  | 12  | 38.71% | 85  | 0 |
|    | missense   | chr6:g.76782198A>G                       | NM_001563.2    | c.8T>C                    | p.Leu3Ser             | IMPG1         | Leu3Ser             | 37  | 20  | 35.09% | 107 | 0 |
|    | missense   | chrX:g.46359311A>T                       | NM_001039891.2 | c.1713T>A                 | p.His571Gln           | ZNF674        | His571Gln           | 91  | 43  | 32.09% | 228 | 0 |
|    | indel      | chr19:g.14208434_14208436dup             | NM_002730.3    | c.597_599dup              | p.Leu199_Cys200insTrp | <b>PRKACA</b> | Leu199_Cys200insTrp | 368 | 79  | 17.67% | 315 | 1 |
| #4 | missense   | chr1:g.53556345C>T                       | NM_006671.4    | c.1165G>A                 | p.Ala389Thr           | SLC1A7        | Ala389Thr           | 70  | 15  | 17.65% | 74  | 1 |
|    | missense   | chr2:g.120979606G>A                      | NM_024121.2    | c.947C>T                  | p.Pro316Leu           | TMEM185B      | Pro316Leu           | 53  | 15  | 22.06% | 74  | 0 |
|    | missense   | chr19:g.14208416A>C                      | NM_002730.3    | c.617T>G                  | p.Leu206Arg           | <b>PRKACA</b> | Leu206Arg           | 224 | 59  | 20.85% | 302 | 0 |
| #5 | indel      | chr1:g.52827213_52827215delTCC           | NM_032449.2    | c.288_290delGGA           | p.Glu97del            | CC2D1B        | Glu97del            | 63  | 7   | 10.00% | 78  | 0 |
|    | missense   | chr19:g.14208416A>C                      | NM_002730.3    | c.617T>G                  | p.Leu206Arg           | <b>PRKACA</b> | Leu206Arg           | 181 | 66  | 26.72% | 288 | 0 |
|    | indel      | chr19:g.33792755_33792757delGGC          | NM_004364.3    | c.564_566delGCC           | p.Pro189del           | CEBPA         | Pro189del           | 25  | 3   | 10.71% | 23  | 0 |
|    | missense   | chr8:g.56436103_56436104delTGinsAA       | NM_052898.1    | c.1270_1271delTGinsAA     | p.Cys424Asn           | XKR4          | Cys424Asn           | 164 | 74  | 31.09% | 220 | 0 |
|    | frameshift | chr1:g.114510495_114510505delCCCATGTTGTC | NM_152696.3    | c.2489_2499delCCCATGTTGTC | p.Ala830Glufs*14      | HIPK1         | Ala830Glufs*14      | 308 | 35  | 10.20% | 409 | 0 |
| #6 | nonsense   | chr1:g.23395062C>T                       | NM_001009999.2 | c.1210C>T                 | p.Gln404*             | KDM1A         | Gln404*             | 73  | 13  | 15.12% | 182 | 0 |
|    | missense   | chr19:g.994242G>A                        | NM_024100.3    | c.1198G>A                 | p.Val400Ile           | WDR18         | Val400Ile           | 155 | 56  | 26.54% | 132 | 0 |
|    | missense   | chr19:g.8807973C>A                       | NM_178525.3    | c.1079G>T                 | p.Arg360Leu           | ACTL9         | Arg360Leu           | 77  | 25  | 24.51% | 82  | 1 |
|    | nonsense   | chr22:g.42422922G>T                      | NM_152613.2    | c.667G>T                  | p.Gly223*             | WBP2NL        | Gly223*             | 172 | 51  | 22.87% | 212 | 0 |
|    | missense   | chr5:g.140237750C>A                      | NM_018901.2    | c.2117C>A                 | p.Ser706Tyr           | PCDHA10       | Ser706Tyr           | 79  | 91  | 53.53% | 169 | 0 |
|    | missense   | chr6:g.74207609G>T                       | NM_001123226.1 | c.2027G>T                 | p.Arg676Leu           | MTO1          | Arg676Leu           | 46  | 14  | 23.33% | 78  | 0 |
|    | missense   | chr6:g.90385235C>T                       | NM_014611.1    | c.12709G>A                | p.Val4237Ile          | MDN1          | Val4237Ile          | 261 | 108 | 29.27% | 327 | 1 |
|    | missense   | chr8:g.113358347T>C                      | NM_052900.2    | c.6109A>G                 | p.Ile2037Val          | CSMD3         | Ile2037Val          | 43  | 10  | 18.87% | 50  | 0 |
| #7 | frameshift | chr12:g.49434924_49434925delG            | NM_003482.3    | c.6628_6629delCC          | p.Pro2210Aspfs*32     | MLL2          | Pro2210Aspfs*32     | 49  | 11  | 18.33% | 52  | 0 |
|    | missense   | chr21:g.38309183C>T                      | NM_000411.6    | c.562G>A                  | p.Asp188Asn           | HLCS          | Asp188Asn           | 146 | 49  | 25.13% | 226 | 0 |
|    | missense   | chr4:g.39257509T>G                       | NM_025132.3    | c.3043T>G                 | p.Leu1015Val          | WDR19         | Leu1015Val          | 108 | 23  | 17.56% | 183 | 1 |
| #8 | missense   | chr11:g.63413986G>A                      | NM_015459.3    | c.611C>T                  | p.Pro204Leu           | ATL3          | Pro204Leu           | 44  | 9   | 16.98% | 68  | 0 |
|    | missense   | chr17:g.7144186A>C                       | NM_007278.1    | c.341T>G                  | p.Val114Gly           | GABARAP       | Val114Gly           | 36  | 9   | 20.00% | 43  | 0 |
|    | missense   | chr19:g.14208416A>C                      | NM_002730.3    | c.617T>G                  | p.Leu206Arg           | <b>PRKACA</b> | Leu206Arg           | 261 | 103 | 28.30% | 207 | 0 |
|    | missense   | chr3:g.118865593C>A                      | NM_152539.2    | c.557C>A                  | p.Ser186Tyr           | C3orf30       | Ser186Tyr           | 92  | 15  | 14.02% | 95  | 0 |
|    | indel      | chr4:g.25032262_25032264delCAG           | NM_018176.3    | c.52_54delCTG             | p.Leu18del            | LGI2          | Leu18del            | 22  | 3   | 12.00% | 15  | 0 |

|     |            |                      |                |           |                      |               |                    |     |     |        |     |   |
|-----|------------|----------------------|----------------|-----------|----------------------|---------------|--------------------|-----|-----|--------|-----|---|
|     | frameshift | chr1:g.157068544delG | NM_001004341.2 | c.440delC | p.Pro147Leufs<br>*32 | ETV3L         | Pro147Leufs*3<br>2 | 15  | 8   | 34.78% | 13  | 0 |
|     | missense   | chr11:g.85361319A>C  | NM_032273.3    | c.20A>C   | p.Asn7Thr            | TMEM126A      | Asn7Thr            | 19  | 5   | 20.83% | 27  | 0 |
|     | missense   | chr15:g.83936926T>C  | NM_001717.3    | c.158A>G  | p.His53Arg           | BNC1          | His53Arg           | 48  | 21  | 30.43% | 82  | 1 |
| #9  | missense   | chr19:g.14208416A>C  | NM_002730.3    | c.617T>G  | p.Leu206Arg          | <b>PRKACA</b> | Leu206Arg          | 172 | 72  | 29.51% | 245 | 0 |
|     | missense   | chr8:g.11301874C>T   | NM_053279.2    | c.47G>A   | p.Gly16Glu           | FAM167A       | Gly16Glu           | 145 | 68  | 31.92% | 219 | 0 |
|     | missense   | chrX:g.119070617C>T  | NM_024528.3    | c.496G>A  | p.Glu166Lys          | NKAP          | Glu166Lys          | 70  | 41  | 36.94% | 111 | 0 |
|     | missense   | chr19:g.21216347G>T  | NM_025189.3    | c.182G>T  | p.Arg61Ile           | ZNF430        | Arg61Ile           | 13  | 4   | 23.53% | 24  | 0 |
| #10 | missense   | chr19:g.14208416A>C  | NM_002730.3    | c.617T>G  | p.Leu206Arg          | <b>PRKACA</b> | Leu206Arg          | 285 | 107 | 27.30% | 233 | 0 |

1

2

3

- 1 **Supplementary Table S4:** Clinical characteristics of the patient series with bilateral ACTH independent adrenal hyperplasia included in the  
 2 genetic analysis

| pat. #         | sex | disease*               | age at diagnosis (years) | catabolic Cushing symptoms (yes/no) | ACTH (pg/ml) | midnight salivary cortisol (ng/ml) | midnight serum cortisol (µg/dl) | serum cortisol after 1mg Dex (µg/dl) | 24h urinary cortisol (µg/d) | PRKACA mutation | PRKACA duplication |
|----------------|-----|------------------------|--------------------------|-------------------------------------|--------------|------------------------------------|---------------------------------|--------------------------------------|-----------------------------|-----------------|--------------------|
| 1              | M   | PPNAD                  | 9                        | yes                                 | 4.7          |                                    | 35.3                            | 28.5                                 | 740                         | no              | yes                |
| 2              | M   | PPNAD                  | 3                        | yes                                 | <5           |                                    | 29.4                            | 23.6                                 | 704                         | no              | yes                |
| 3 <sup>%</sup> | M   | PPNAD                  | 23                       | yes                                 | <5           |                                    |                                 | 28                                   |                             | no              | yes                |
| 4 <sup>%</sup> | F   | PPNAD                  | 39                       | yes                                 | <10          |                                    |                                 | 25                                   | 206                         | no              | yes                |
| 5              | M   | AIMAH                  | 3                        | yes                                 | 7.2          | 157                                |                                 | 21.9                                 |                             | no              | yes                |
| 6              | F   | PPNAD / acromegaly     | 41                       | yes                                 | 1            |                                    | 27                              | 36                                   | 1134                        | no              | no                 |
| 7              | F   | PPNAD                  | 35                       | yes                                 | 4.7          | 3.18                               | 19.8                            | 19.1                                 | 984                         | no              | no                 |
| 8              | F   | PPNAD                  | 41                       | yes                                 |              |                                    |                                 |                                      |                             | no              | no                 |
| 9              | F   | PPNAD                  | 9                        | yes                                 | 11           |                                    | 7.2                             |                                      | 975                         | no              | no                 |
| 10             | M   | PPNAD                  | 2                        | yes                                 | <5           |                                    |                                 |                                      |                             | no              | no                 |
| 11             | M   | PPNAD                  | 20                       | yes                                 | <5.0         |                                    | 23.5                            | 28.2                                 | 598                         | no              | no                 |
| 12             | F   | PPNAD                  | 47                       | yes                                 | <5           |                                    |                                 |                                      |                             | no              | no                 |
| 13             | F   | PPNAD                  | 46                       | yes                                 | <5.0         |                                    |                                 |                                      | 1638                        | no              | no                 |
| 14             | F   | PPNAD                  | 1                        | yes                                 | 5.7          |                                    | 24                              | 28                                   | 836                         | no              | no                 |
| 15             | F   | PPNAD                  | 5                        | yes                                 | 5.8          |                                    | 6                               |                                      | 775                         | no              | no                 |
| 16             | F   | PPNAD                  | 3                        | yes                                 | 6.9          |                                    |                                 |                                      | 879                         | no              | no                 |
| 17             | M   | PPNAD                  | 7                        | yes                                 |              |                                    |                                 |                                      | 1072                        | no              | no                 |
| 18             | M   | PPNAD                  | 13                       | yes                                 | <5.0         |                                    | 19.9                            | 19.9                                 | 350                         | no              | no                 |
| 19             | F   | PPNAD                  | 12                       | yes                                 | 13.7         |                                    | 10.4                            |                                      | 661                         | no              | no                 |
| 20             | F   | PPNAD                  | 9                        | yes                                 | <5.0         |                                    |                                 | 21                                   |                             | no              | no                 |
| 21             | M   | PPNAD                  | 7                        | yes                                 | <10          |                                    | 24                              |                                      | 100                         | no              | no                 |
| 22             | F   | PPNAD / thyroid cancer | 68                       | yes                                 |              |                                    |                                 |                                      |                             | no              | no                 |
| 23             | F   | PPNAD                  | 15                       | yes                                 | <5.0         |                                    |                                 | 26.6                                 |                             | no              | no                 |

|    |   |       |    |     |      |      |      |          |    |    |
|----|---|-------|----|-----|------|------|------|----------|----|----|
| 24 | F | PPNAD | 12 | yes | <2   | 17.7 | 18.3 | 1450     | no | no |
| 25 | F | PPNAD | 22 | yes | <5.0 |      | >5   | elevated | no | no |
| 26 | F | iMAD  | 1  | yes | <5   |      |      |          | no | no |
| 27 | F | PPNAD | 7  | yes | <5   | 22.3 |      | 135      | no | no |
| 28 | F | PPNAD | 19 | yes | <5   |      |      |          | no | no |
| 29 | ? | AIMAH | 60 |     | <5   |      |      |          | no | no |
| 30 | F | PPNAD | 14 | yes | <5   |      |      |          | no | no |
| 31 | M | iMAD  | 13 | yes | 5.4  | 17   | 11   | 4200     | no | no |
| 32 | F | PPNAD | 10 | yes | <5   | 16.6 |      | 391      | no | no |
| 33 | M | PPNAD | 11 | yes | <5.0 | 25.3 | 5.43 | 4245     | no | no |
| 34 | F | PPNAD | 30 | yes | <5.0 | 26.6 | 26.6 | elevated | no | no |
| 35 | F | PPNAD | 27 | yes | 4    | <1   |      | 1136     | no | no |

1 \*PPNAD, primary pigmented nodular adrenal disease; iMAD, isolated micronodular adrenocortical disease; AIMAH, ACTH independent macronodular adrenal hyperplasia;  
 2 Dex, dexamethasone

3 % indicates mother and son. For reference ranges of the endocrine parameters see Supplementary Text above (page 6).

4

5

1 **Supplementary Table S5:** Expression analysis of adrenal adenomas dependent on their  
 2 mutational status (*PRKACA* mutated vs. non-mutated)

3  
 4 **Expression analysis of adenomas independent of functional status (n=39)<sup>#</sup>**

| gene symbol | probe set ID | no <i>PRKACA</i><br>mutation<br>(n=31)* | <i>PRKACA</i><br>mutation<br>(n=8)* | p <sup>†</sup> |
|-------------|--------------|-----------------------------------------|-------------------------------------|----------------|
| MC2R        | 208568       | 7.03±1.05                               | 8.65±0.52                           | <0.001         |
| CYP11B1     | 1552493_s    | 10.94±0.51                              | 10.71±0.20                          | 0.05           |
| StAR        | 204548       | 12.33±0.27                              | 12.79±0.14                          | <0.001         |
| CYP21A2     | 214622       | 10.94±1.42                              | 12.31±0.34                          | <0.001         |
| HSD3B2      | 206294       | 12.21±0.45                              | 12.95±0.15                          | <0.001         |
| CYP11A1     | 204309       | 10.97±0.63                              | 11.95±0.26                          | <0.001         |

5  
 6  
 7 **Expression analysis of adenomas associated with overt Cushing's syndrome (n=19)**

| gene symbol | probe set ID | no <i>PRKACA</i><br>mutation<br>(n=11)* | <i>PRKACA</i><br>mutation<br>(n=8)* | p <sup>†</sup> |
|-------------|--------------|-----------------------------------------|-------------------------------------|----------------|
| MC2R        | 208568       | 7.34±1.29                               | 8.65±0.52                           | 0.009          |
| CYP11B1     | 1552493_s    | 10.71±0.68                              | 10.71±0.20                          | 0.99           |
| StAR        | 204548       | 12.34±0.36                              | 12.79±0.14                          | 0.002          |
| CYP21A2     | 214622       | 10.40±2.26                              | 12.31±0.34                          | 0.02           |
| HSD3B2      | 206294       | 12.41±0.42                              | 12.95±0.15                          | 0.001          |
| CYP11A1     | 204309       | 11.29±0.67                              | 11.95±0.26                          | 0.01           |

8 n indicates the number of subjects within each group; <sup>#</sup> complete group consisting of inactive adenomas (n=9),  
 9 and adenomas associated with subclinical Cushing's syndrome (n=11) and overt Cushing's syndrome (n=19);\*  
 10 values indicate mean±SD; † values between adenomas of the respective groups were compared using t-test.

11  
 12  
 13

## 1 ACKNOWLEDGMENTS

2 The research leading to these results has received funding from the Seventh  
3 Framework Programme (FP7/2007-2013) under grant agreement n° 259735 (to F.B., M.F.,  
4 J.B., and B.A.). The study was further supported in part by the Wilhelm Sander-Stiftung  
5 (grant # 2012.095.1 to B.A.), the Else Kröner-Fresenius-Stiftung (grant # 2012\_A103 to  
6 M.R.), Bundesministerium für Bildung und Forschung (grant # BMBF 01EO1004 - D2 to  
7 M.F. and B.A.), the COMETE Network (Programme Hospitalier de Recherche Clinique Grant  
8 AOM95201), the INCa Recherche Translationelle 2009-RT-02, the Institut National de la  
9 Santé et de la Recherche Médicale (G.A. is receiving a Contrat d'Interface), the Conny-  
10 Maeva Charitable Foundation, the European Research Council (Advanced Grant TOPAS to  
11 M.J.L.), the Deutsche Forschungsgemeinschaft (Rudolf Virchow Center / DFG-Research  
12 Center for Experimental Biomedicine FZT82 to C.K. and M.J.L., DFG grant CA1014/1-1 to  
13 D.C.), the Telethon 2010 grant (GGP10121) to O.Z., and by the Intramural Research Program  
14 of the *Eunice Kennedy Shriver* National Institute of Child Health & Human Development.

15 We thank the tumor bank of Cochin hospital (Prof B. Terris) for help with sample  
16 collection. We further acknowledge the work of Drs. Anelia Horvath (now at George  
17 Washington University, Washington, DC), Isaac Levy (now at Toronto Children's Hospital,  
18 Toronto, Canada), Kiran Nadela (now at Otsuka America Pharmaceutical Inc., Rockville,  
19 MD), and Maria Nesterova (NICHD, NIH, Bethesda, MD) in earlier phases of this project as  
20 well as JoAnn C. Kelly, Zunyan Dai, Eric D. Smith, Marc A. Sanidad, and Philip Mowrey  
21 (Quest Diagnostics Nichols Institute, Chantilly, VA) for technical assistance with the FISH  
22 analysis and Marco Fichera for help with the Database of Genomic Variants. Special thanks  
23 go to the clinicians who referred patients who were then found to have PRKACA defects: Dr.  
24 Glenn Braunstein (Cedars Sinai Hospital, Los Angeles, CA, USA), Dr Louise Izatt (Guy's

1 Hospital, London, UK) and James Gardner (Pediatric Endocrinology Pediatric Specialty  
2 Clinic Our Lady of the Lake Physician Group, Baton Rouge, LA, USA). Finally, the authors  
3 are indebted to Prof. W. Arlt (University of Birmingham) for helpful comments to the  
4 manuscript.

5

## 1 REFERENCES

- 2 1. Beuschlein F, Boulkroun S, Osswald A, et al. Somatic mutations in ATP1A1 and ATP2B3 lead to  
3 aldosterone-producing adenomas and secondary hypertension. *Nat Genet* 2013;doi: 10.1038/ng.2550.
- 4 2. Vetro A, Manolakos E, Petersen MB, et al. Unexpected results in the constitution of small  
5 supernumerary marker chromosomes. *European journal of medical genetics* 2012;55:185-90.
- 6 3. Calebiro D, Nikolaev VO, Gagliani MC, et al. Persistent cAMP-signals triggered by internalized G-  
7 protein-coupled receptors. *PLoS Biol* 2009;7:e1000172.
- 8 4. Calebiro D, de Filippis T, Lucchi S, et al. Selective modulation of protein kinase A I and II reveals  
9 distinct roles in thyroid cell gene expression and growth. *Molecular endocrinology* 2006;20:3196-211.
- 10 5. Livak KJ, Schmittgen TD. Analysis of relative gene expression data using real-time quantitative PCR  
11 and the 2<sup>-</sup>(Delta Delta C(T)) Method. *Methods* 2001;25:402-8.
- 12 6. Vincent-Dejean C, Cazabat L, Groussin L, et al. Identification of a clinically homogenous subgroup of  
13 benign cortisol-secreting adrenocortical tumors characterized by alterations of the protein kinase A (PKA)  
14 subunits and high PKA activity. *Eur J Endocrinol* 2008;158:829-39.
- 15 7. Ronchi CL, Sbiera S, Leich E, et al. Single nucleotide polymorphism array profiling of adrenocortical  
16 tumors - evidence for an adenoma carcinoma sequence? *PLoS One* 2013;8:e73959.
- 17 8. Wilmot Roussel H, Vezzosi D, Rizk-Rabin M, et al. Identification of gene expression profiles  
18 associated with cortisol secretion in adrenocortical adenomas. *J Clin Endocrinol Metab* 2013;98:E1109-21.
- 19
